# Supplementary material
Source: publisher figshare collection journal article supplement (https://gsapubs.figshare.com/ndownloader/files/22744904)
Supplement: Supplementary file 1 [file 22744904]

## Data Repository item 2005060

|                                 | <b>Trent</b>                          | <b>Cavendish</b>                      | <b>Southern North Sea (SNS) Megamerge</b>   |
|---------------------------------|---------------------------------------|---------------------------------------|---------------------------------------------|
| <b>Acquisition Date</b>         | 1992                                  | 1995                                  | 1992-1999                                   |
| <b>Acquisition Contractor</b>   | Western Geophysical                   | Geco                                  | Various                                     |
| <b>Operator</b>                 | Arco British                          | Geco                                  | Conoco/Arco/PGS/Shell                       |
| <b>Energy Source</b>            | Dual Sleeve Gun Arrays                | Sleeve Guns                           | Dual Airgun Arrays                          |
| <b>Receiver Spacing</b>         | 12.5m                                 | 12.5m                                 | 12.5m - 25m                                 |
| <b>Line Spacing</b>             | 25m                                   | 25m                                   | 25m                                         |
| <b>Nominal Fold of Coverage</b> | 36                                    | 30 - 36                               | 30 - 60                                     |
| <b>(Re)Processing Date</b>      | 1996                                  | 1996                                  | 1993-2000                                   |
| <b>Processing Contractor</b>    | C.G.G.                                | Western/Geco                          | Various/PGS                                 |
| <b>Key Processes</b>            | 3D Stack/Post-stack 3D Time Migration | 3D Stack/Post-stack 3D Time Migration | 3D Stack/Merge/Post-stack 3D Time Migration |
| <b>Subline Trace Spacing</b>    | 12.5m                                 | 12.5m                                 | 12.5m                                       |
| <b>Crossline Spacing</b>        | 12.5m                                 | 12.5m                                 | 12.5m                                       |
| <b>Sampling Interval</b>        | 4ms (approx. 6m)                      | 4ms (approx. 6m)                      | 4ms (approx. 6m)                            |
| <b>Present Data Owner</b>       | Perenco                               | WesternGeco                           | Petroleum Geo-Services (PGS)                |

There are three movie files included with this Data Repository.

DR1: Central Peak

DR2: Zoom to Centre high resolution

DR3: Zoom to Centre low resolution

Movies in .avi format can also be downloaded from <http://mgg.rsmas.miami.edu/groups/csl/gpr/>.

For best interactive performance use mplay32.exe to play movies. (this player is delivered with all windows platforms: Do a search for mplay32.exe in File Explorer)
